# Supplementary material
Source: publisher figshare collection journal article supplement (https://acs.figshare.com/ndownloader/files/4564513)

## Supplemental Figures

### **Oxidative Stress and Asthma: Proteome Analysis of Chitinase-like Proteins and FIZZ1 in Lung Tissue and Bronchoalveolar Lavage Fluid**

Lifeng Zhang<sup>1</sup>, Meiying Wang<sup>1</sup>, Xuedong Kang<sup>2</sup>, Pinmanee Boontheung<sup>3</sup>, Ning Li<sup>1</sup>, Andre E. Nel<sup>1\*</sup>, and Joseph A. Loo<sup>2,3\*</sup>

<sup>1</sup> Division of NanoMedicine, Department of Medicine, David Geffen School of Medicine,

<sup>2</sup>Department of Biological Chemistry, David Geffen School of Medicine, and <sup>3</sup>Department of Chemistry and Biochemistry, University of California-Los Angeles

*Journal of Proteome Research*

**Supplemental Figure 1.** Flow chart of proteome analysis of allergen-induced asthmatic mice bronchoalveolar lavage fluid (BALF) and lung tissue.

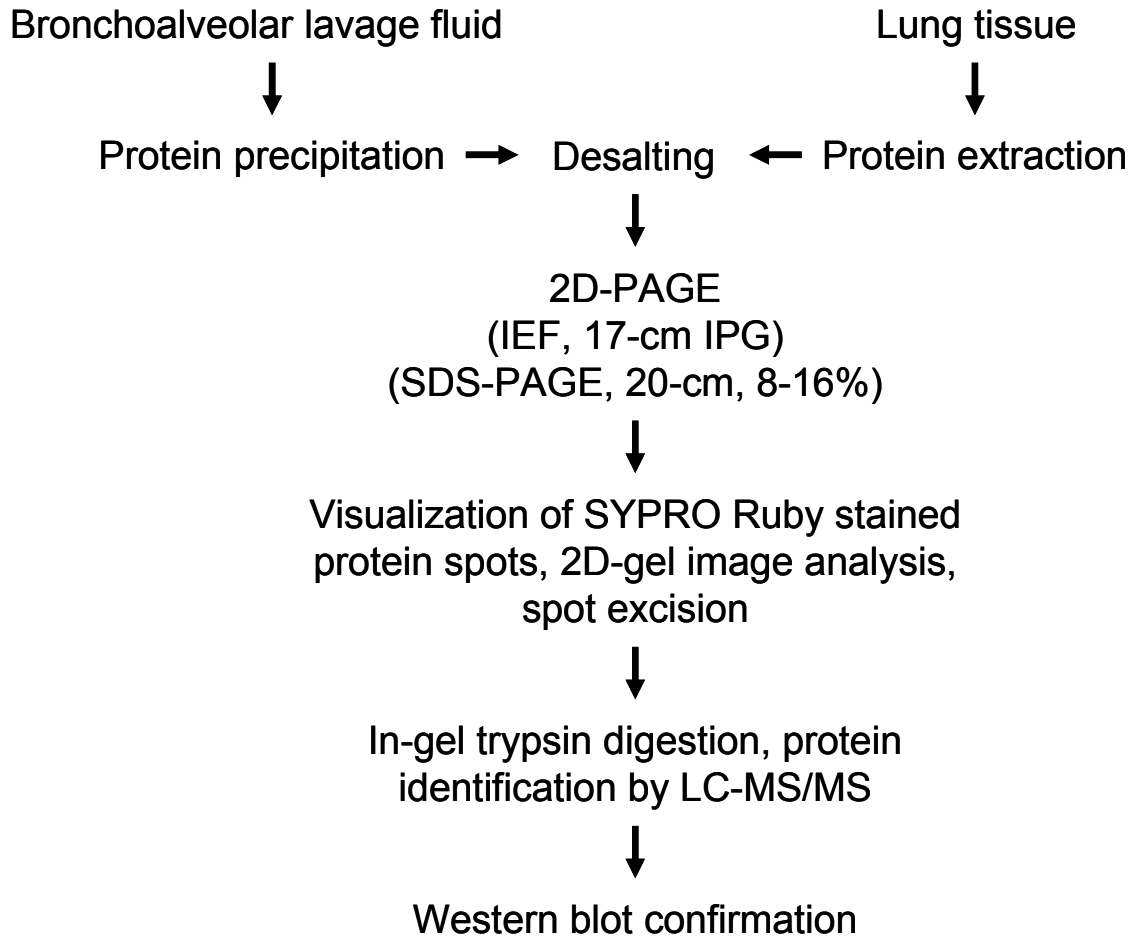

**Supplemental Figure 2.** (A) Protein concentration of BALF from different treatment of mouse groups. (B) Total and differential BAL cell counts.

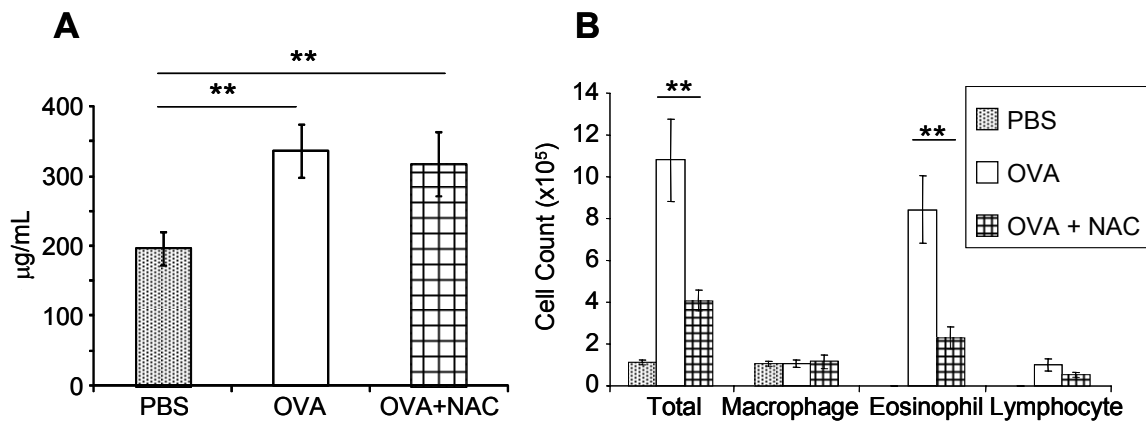

**Supplemental Figure 3.** Serum OVA-specific IgG1 (A) and IgE (B) levels from different treatment of mouse groups, as determined by means of ELISA.

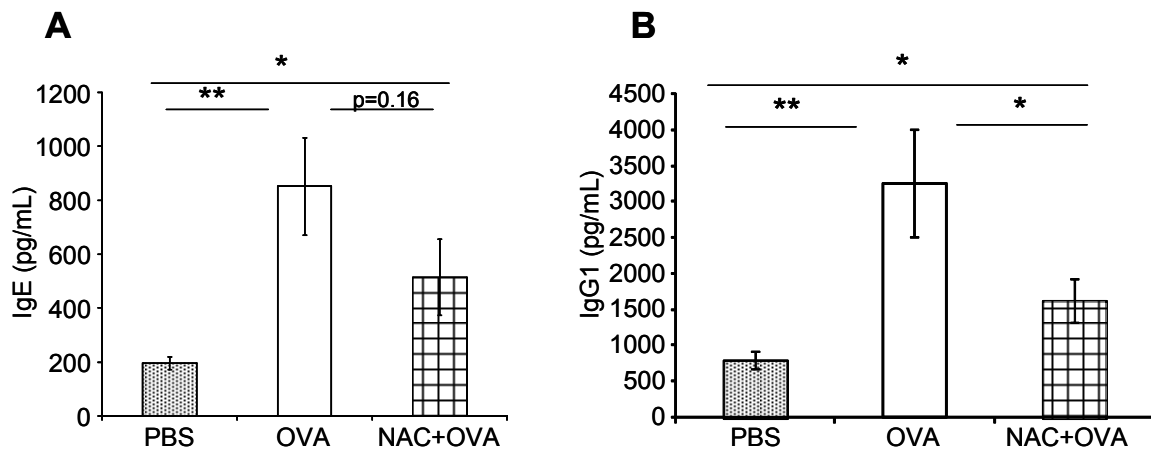

**Supplemental Figure 4.** H & E staining of lung tissues showing OVA-induced lung inflammation (magnification 200x). OVA aerosol challenge induced marked infiltration of inflammatory cells as compared to saline aerosol challenge. NAC attenuated OVA-induced lung inflammation to the level comparable to that of the saline control.

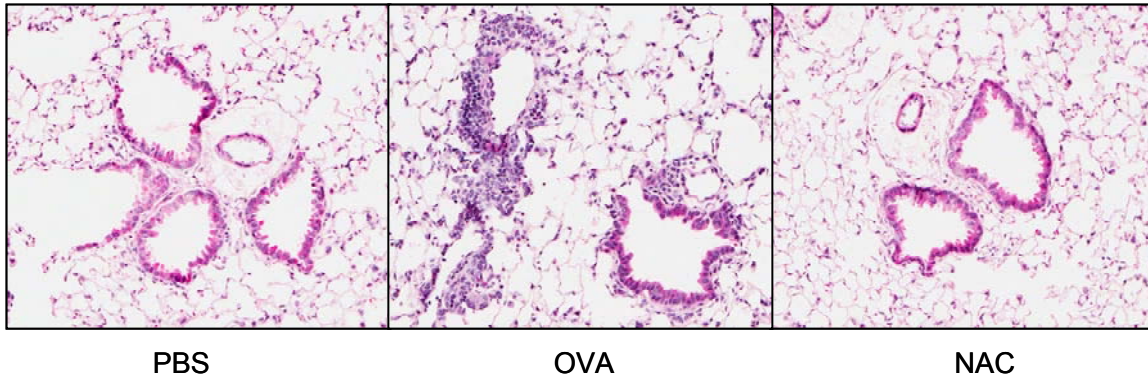

**Supplemental Figure 5.** Expanded images of up-regulated protein spots from BALF (Fig. 2).

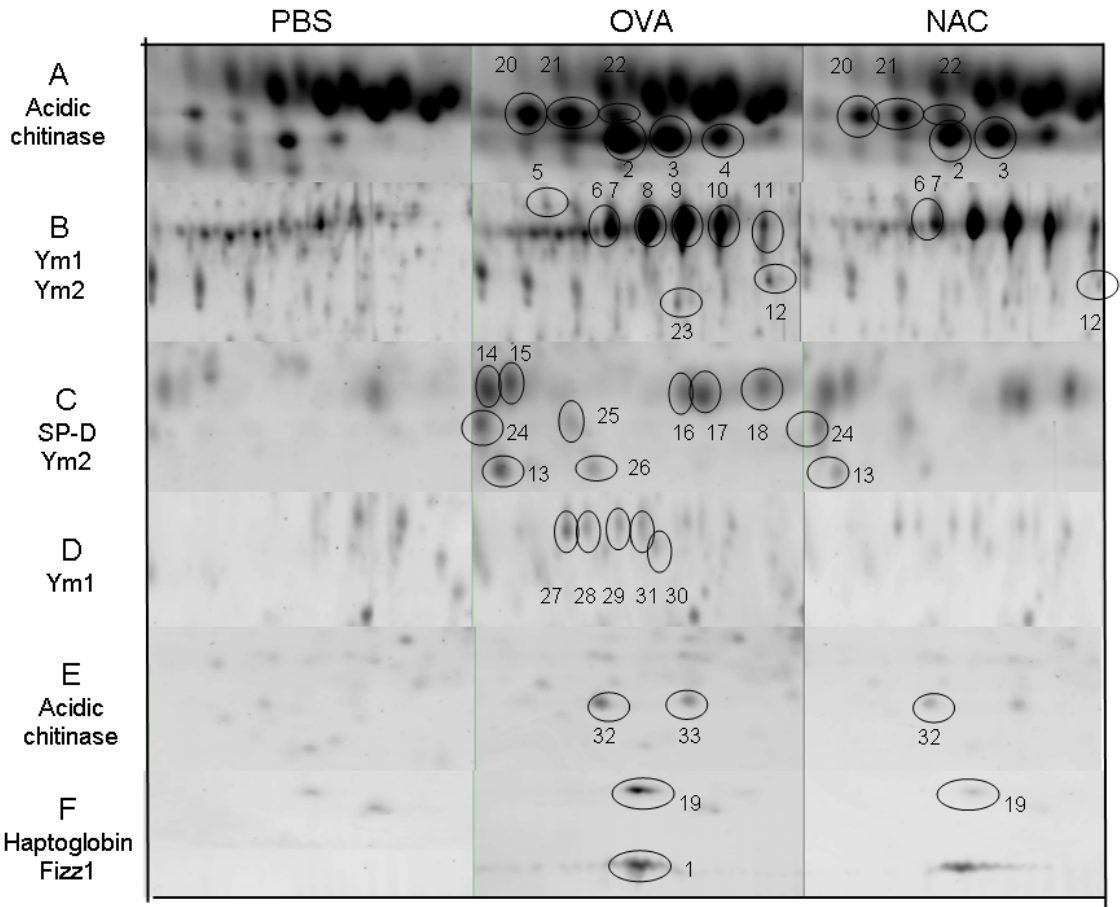

**Supplemental Figure 6.** Representative 2D gel of lung tissue (from OVA group). 175  $\mu$ g of murine lung protein was separated on 17-cm IPG (pI 4-7), followed by 8-16% SDS-PAGE. Proteins were stained with Sypro Ruby. All spots labeled were increased at least 4-fold from OVA sensitized mouse compared to the PBS treated control.

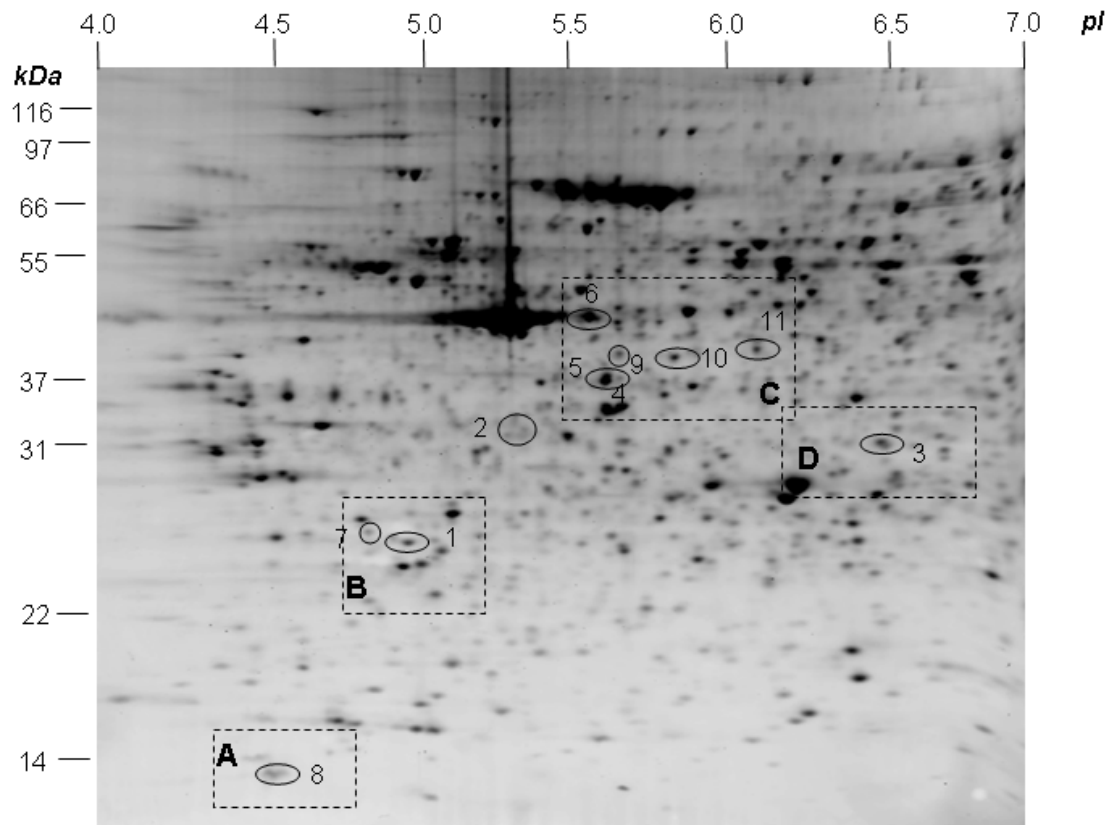

**Supplemental Figure 7.** Expanded images of up-regulated protein spots from lung tissue (Supplemental Fig. 6).

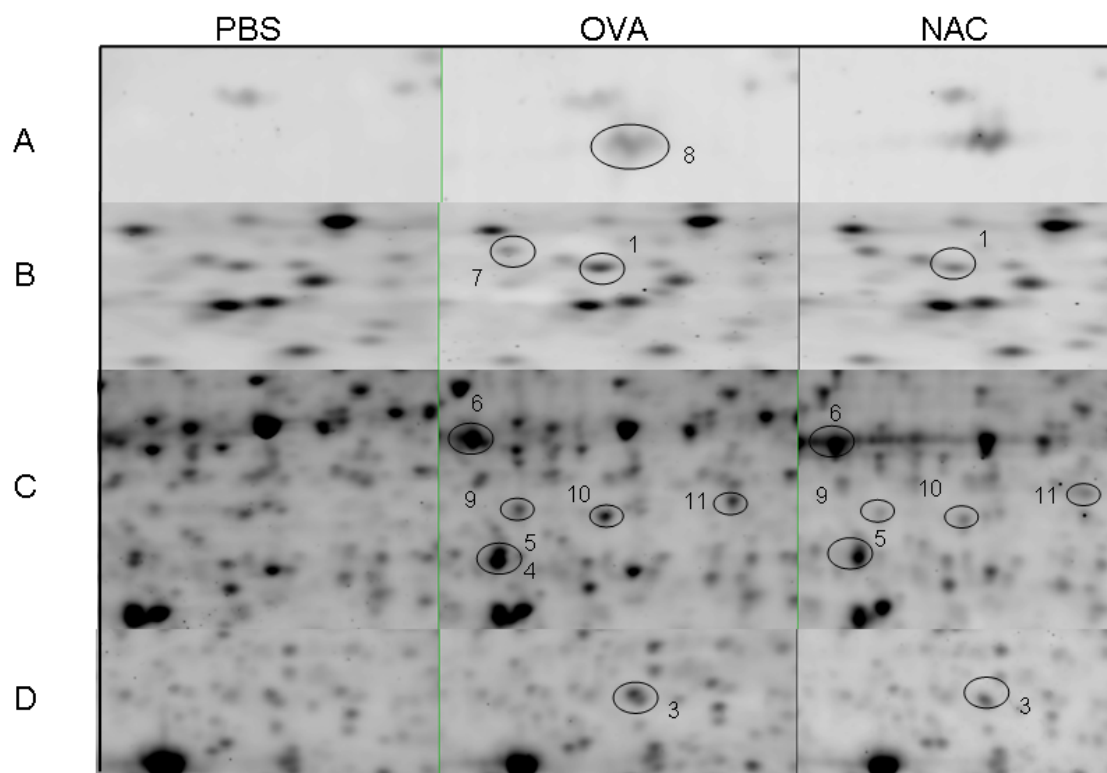

Supplement: Supplementary file 1 [file 4564513]
